# Supplementary material for: Percutaneous Coronary Intervention Outcomes in Patients with Liver Cirrhosis: A Systematic Review and Meta-Analysis
Source: MDPI journal article supplement (doi:10.3390/jcdd10030092), 2023-02-21
Supplement: s1 [file s1]

**Table S1.** Newcastle-Ottawa Scale for risk of bias assessment for cohort studies.

| Author               | Selection<br>n | Comparability | Outcome | Total |
|----------------------|----------------|---------------|---------|-------|
| Lu et al [21]        | **             | **            | ***     | 7/9   |
| Alazzawi et al [22]  | ***            | **            | ***     | 8/9   |
| Alqahtani et al [23] | **             | **            | ***     | 7/9   |

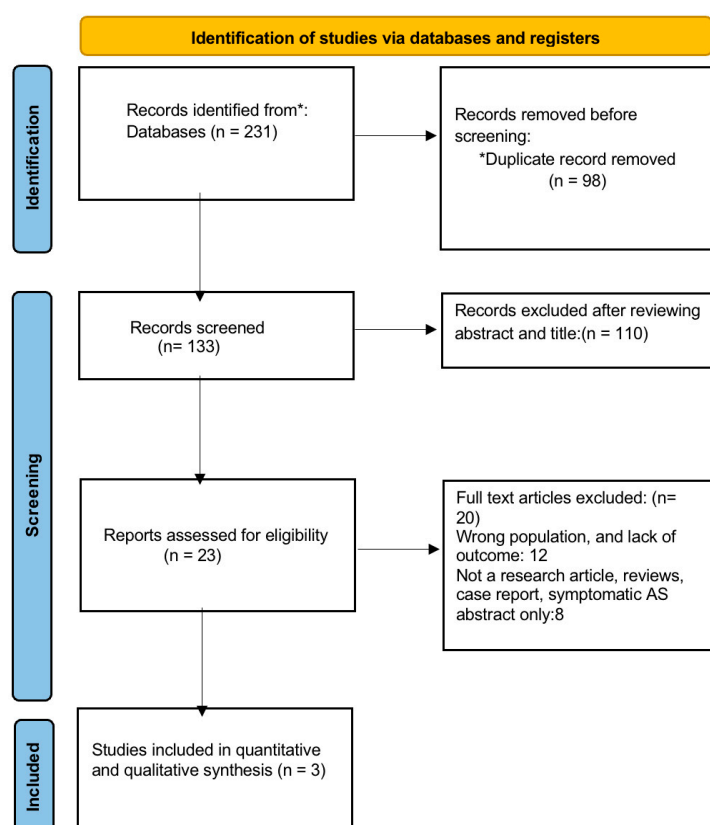

**Figure S1.** Preferred Reporting Items for Systematic review and Meta-analysis flow of the search strategy for systematic review and meta-analysis.

Outcome definitions:

Stroke: A stroke, sometimes called a brain attack, occurs when something blocks blood supply to part of the brain or when a blood vessel in the brain bursts. (CDC)

GI bleeding: Gastrointestinal (GI) bleeding is any type of bleeding that starts in the GI tract. GI bleeding is a symptom of a disease or condition, rather than a disease or condition itself.

AKI: KDIGO defines AKI as any of the following: Increase in serum creatinine by 0.3mg/dL or more within 48 hours or. Increase in serum creatinine to 1.5 times baseline or more within the last 7 days or. Urine output less than 0.5 mL/kg/h for 6 hours.

Vascular complications: Vascular disease includes any condition that affects your circulatory system, or system of blood vessels
